# Supplementary material for: SnSbvs.Sn: improving the performance of Sn-based anodes for K-ion batteries by synergetic alloying with Sb
Source: Royal Society of Chemistry journal article supplement (doi:10.1039/c9ta03760h), 2019-01-01
Supplement: c9ta03760h1.pdf [file c9ta03760h1.pdf]

**SnSb vs. Sn: improving the performance of Sn-based anodes for K-ion batteries by  
synergetic alloying with Sb**

Vincent Gabaudan <sup>ab</sup>, Romain Berthelot <sup>ab</sup>, Moulay Tahar Sougrati <sup>ab</sup>, Pierre-Emmanuel Lippens <sup>ab</sup>,  
Laure Monconduit <sup>ab</sup>, Lorenzo Stievano <sup>ab\*</sup>

*<sup>a</sup>Institut Charles Gerhardt Montpellier (ICGM), UMR 5253 CNRS, Univ. Montpellier, Montpellier  
(France)*

*<sup>b</sup>Réseau sur le Stockage Electrochimique de l'Énergie (RS2E), CNRS, Amiens (France)*

**SUPPLEMENTARY INFORMATION**

---

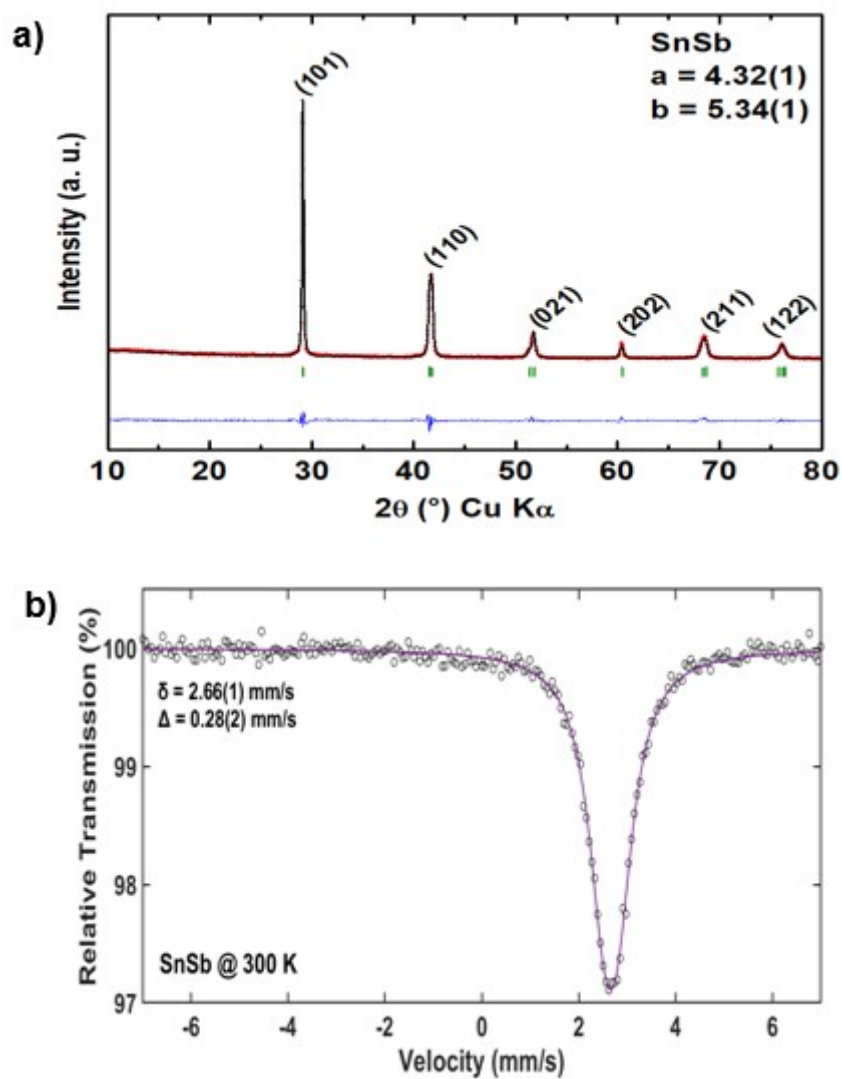

**Figure S1.** Characterization of SnSb powder synthesized by ball milling a) XRD pattern b)  $^{119}\text{Sn}$  Mossbauer spectrum

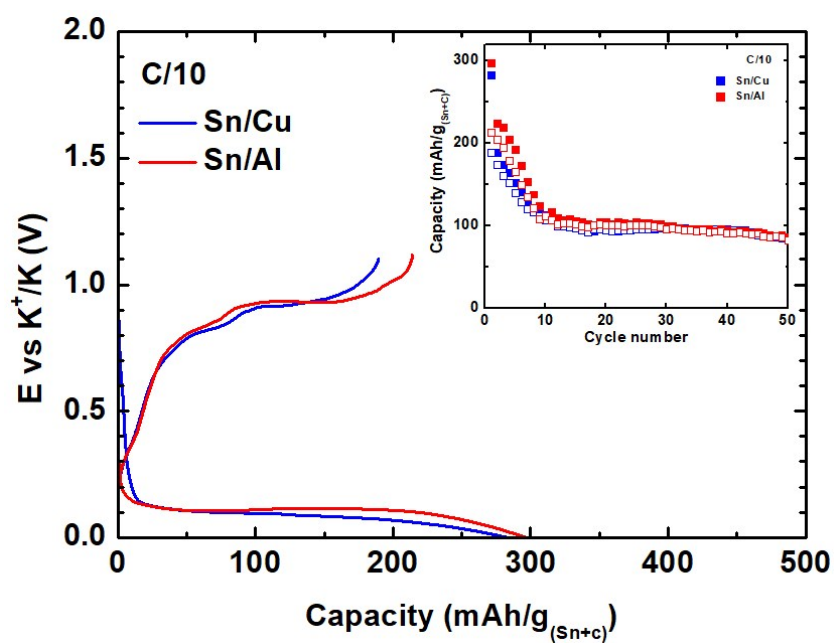

**Figure S2.** Voltage vs. capacity curves of the first discharge/charge in galvanostatic regime of  $\beta$ -Sn electrodes supported on Cu and Al current collectors and inset, the corresponding capacity retention.

### Evaluation of capacity from carbon additives

In order to evaluate the electrochemical contribution of carbon additives to the capacity, galvanostatic measurements were performed on C65/VGCF/CMC electrode (wt. % 35/35/30) cycled at 20 mA/g. The carbon electrode showed a discharge/charge capacity of 310/199 mAh/g during the first cycle with an initial coulombic efficiency of 64 %. A reversible capacity of 180 mAh/g is maintained after 30 cycles corresponding to a capacity retention of 90 %. Considering that Sn and SnSb electrodes contain 18 wt. % of C65/VGCF, the contribution of carbon from the formulation to the reversible capacity of Sn and SnSb electrodes can be evaluated to 32 mAh/g.

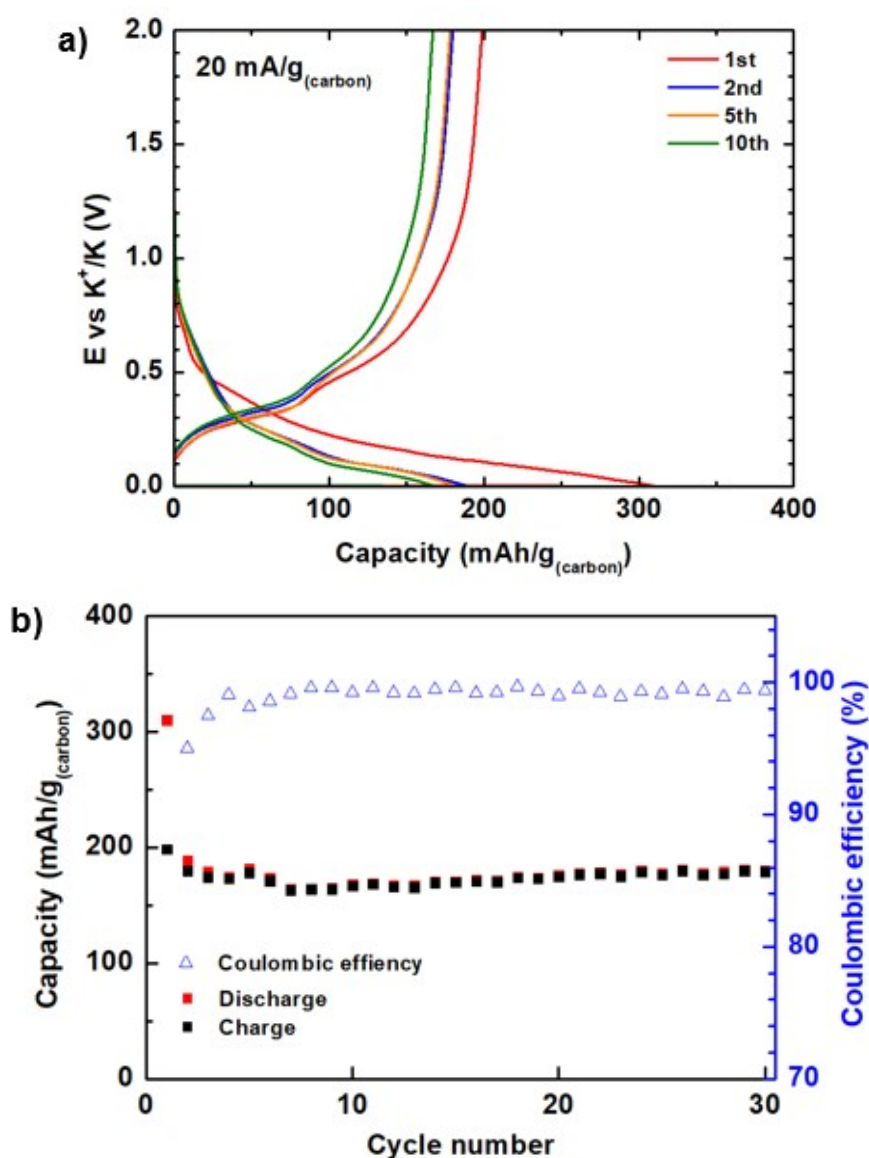

**Figure S3.** a) Galvanostatic discharge/charge capacity of C65/VGCF electrode at a current density of 20 mA/g and b) the corresponding capacity retention and coulombic efficiency.

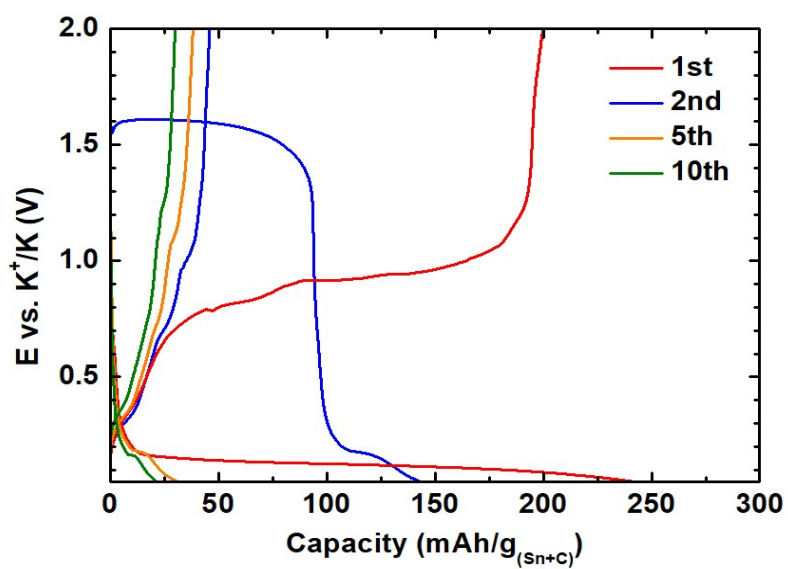

**Figure S4.** Galvanostatic discharge/charge profile of  $\beta$ -Sn electrode in K half-cell at C/10 rate between 0.0 and 2.0 (V)

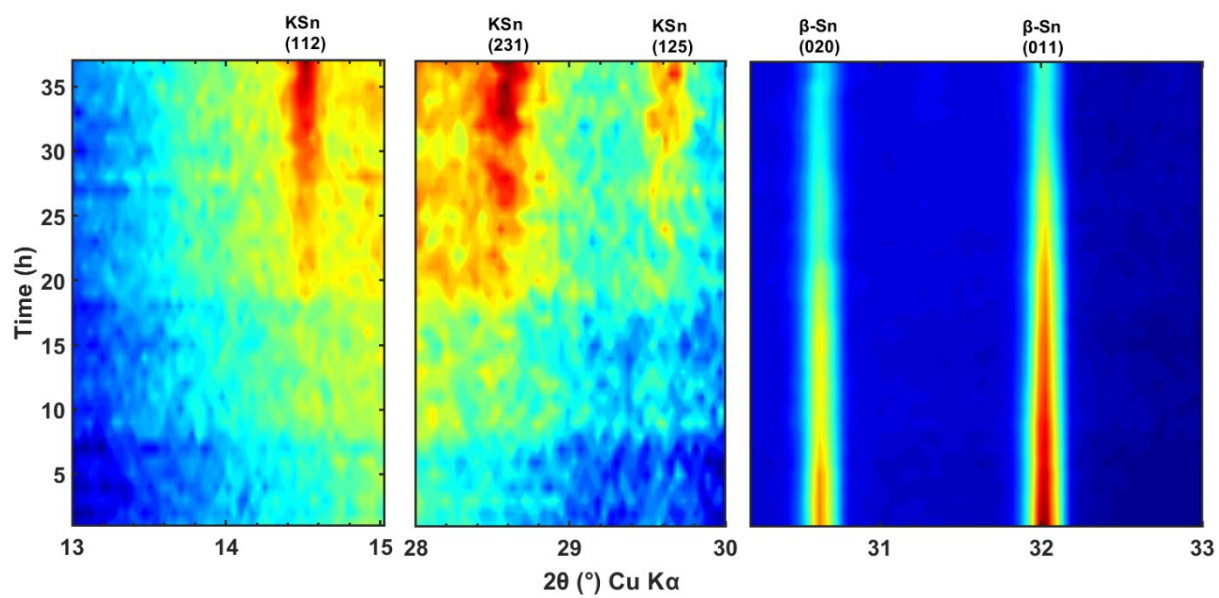

**Figure S5.** Contour plot of the *operando* XRD patterns of  $\beta$ -Sn electrode cycled at C/20.

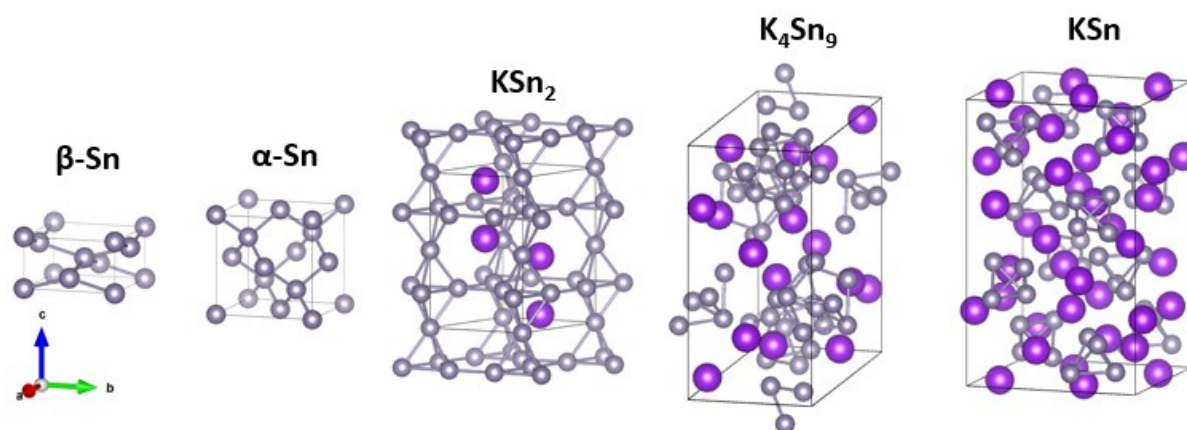

**Figure S6.** Crystal structures of  $\beta$ -Sn,  $\alpha$ -Sn,  $\text{KSn}_2$ ,  $\text{K}_4\text{Sn}_9$  and  $\text{KSn}$ .

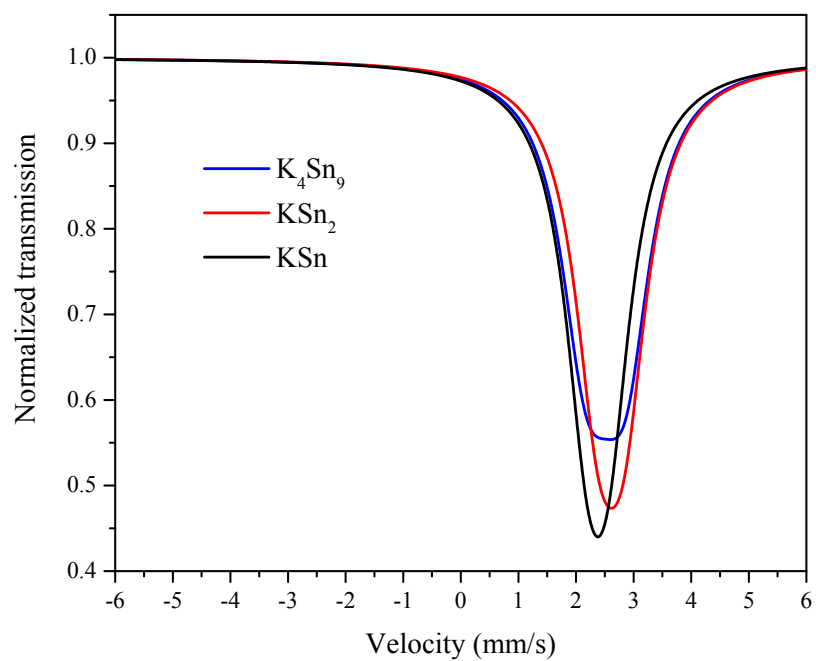

**Figure S7.** Theoretical  $^{119}\text{Sn}$  Mössbauer spectra of  $\text{K}_4\text{Sn}_9$ ,  $\text{KSn}_2$  and  $\text{KSn}$  obtained from theoretical values of isomer shift and quadrupole splitting and  $\Gamma = 1$  mm/s.



| Phase                          | Space group               | Lattice parameters (Å)               | Z  | Cell volume (Å <sup>3</sup> ) | Code ICSD |
|--------------------------------|---------------------------|--------------------------------------|----|-------------------------------|-----------|
| KSn                            | <i>I4<sub>1</sub>/acd</i> | a = 11.42 ; c = 18.57                | 32 | 2427.45                       | 409435    |
| KSn <sub>2</sub>               | <i>P6<sub>3</sub>/mmc</i> | a = 6.427 ; c = 10.43                | 4  | 373.11                        | 190812    |
| K <sub>4</sub> Sn <sub>9</sub> | <i>P2<sub>1</sub>/c</i>   | a = 14.238 ; b = 8.3554 ; c = 16.487 | 4  | 1953.1                        | 240048    |
| β-Sn                           | <i>I4<sub>1</sub>/amd</i> | a = 5.8310 ; c = 3.1820              | 4  | 108.19                        | 040037    |
| α-Sn                           | <i>Fd-3m</i>              | a = 6.4892                           | 8  | 273.28                        | 040037    |

**Table S1.** Structural parameters of α-Sn, β-Sn, K<sub>4</sub>Sn<sub>9</sub>, KSn<sub>2</sub> and KSn as reported in the Inorganic Crystal Structure Database (ICSD)

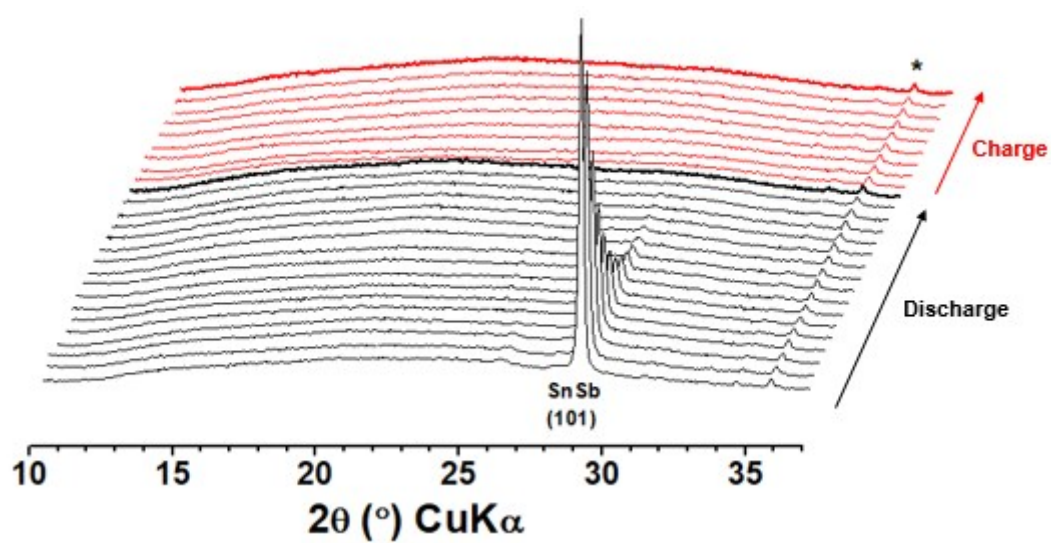

**Figure S8.** *Operando* XRD patterns of SnSb electrode cycled at C/10. The peak indicated by a star (\*) is due to beryllium window.
